# Supplementary material
Source: publisher site journal article supplement (http://www.kjim.org/upload/media/kjim-2021-299-suppl2.pdf)
Supplement: Supplementary file 1 [file kjim-2021-299-suppl2.pdf]

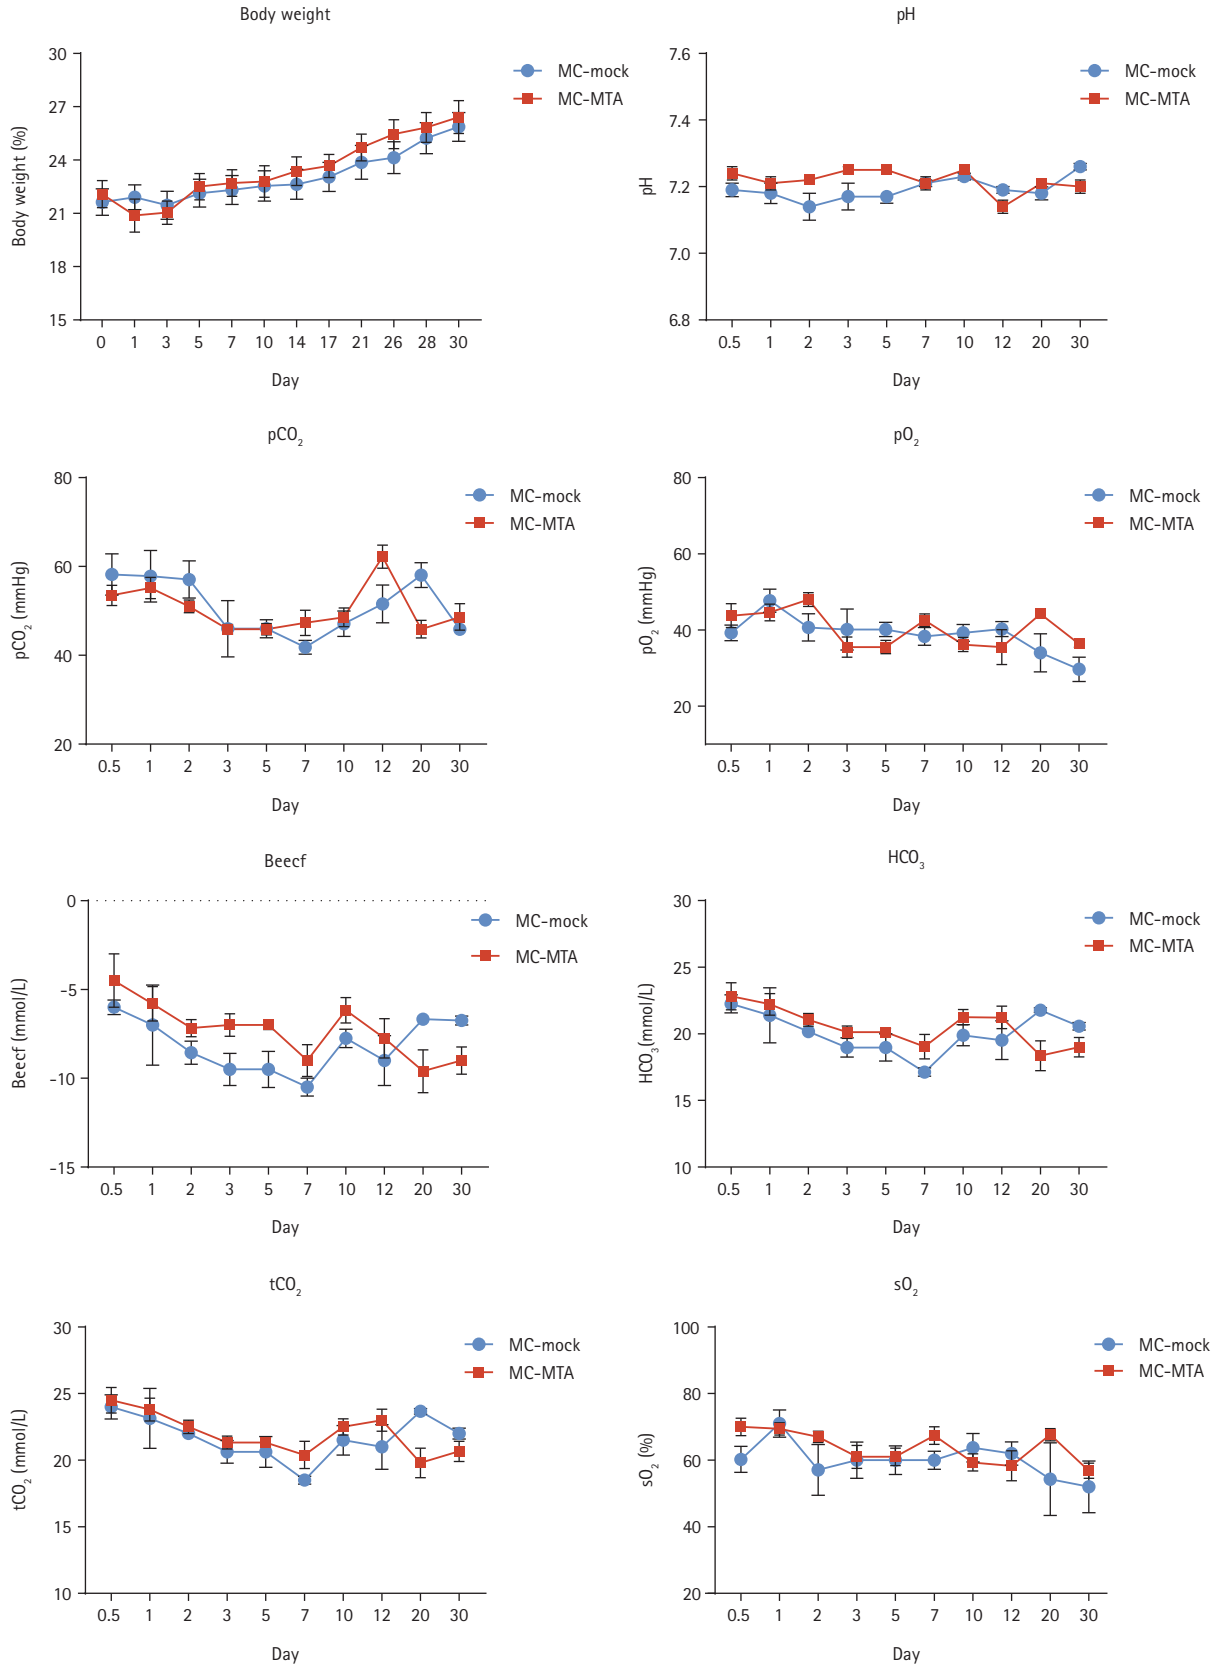

**Supplementary Figure 1.** Body weight and basic functions using G3+ cartridge. MC, minicircle; MTA, multiple target-directed agent.
